# Supplementary material
Source: publisher site journal article supplement (https://www.dovepress.com/article/234813)
Supplement: Supplementary file 1 [file get_supplementary_file.php]

## Supplement

**Table S1** Full subgroup definitions

| Survey question                                                                                                                | Subgroup                   | n   |
|--------------------------------------------------------------------------------------------------------------------------------|----------------------------|-----|
| Q6c: To the best of your knowledge, how many times (if any) has the patient attempted to commit suicide?                       | Number of suicide attempts |     |
| ◆ [Typed answer $\geq 1$ ]                                                                                                     | $\geq 1$                   | 153 |
| ◆ [Typed answer 0]                                                                                                             | 0                          | 204 |
| ◆ Don't know/unsure                                                                                                            | Excluded                   | 51  |
| Q6a: Which of the following statements best describes this patient's experience regarding hospitalization?                     | Number of hospitalizations |     |
| ◆ Patient has been hospitalized for schizophrenia at least twice but is not currently hospitalized                             | $\geq 2$                   | 296 |
| ◆ Patient is currently hospitalized (has been hospitalized in the past)                                                        | $\geq 2$                   | 26  |
| ◆ Patient has never been hospitalized for schizophrenia                                                                        | $\leq 1$                   | 20  |
| ◆ Patient has been hospitalized for schizophrenia (one hospitalization only) but is not currently hospitalized                 | $\leq 1$                   | 54  |
| ◆ Patient is currently hospitalized (first hospitalization)                                                                    | $\leq 1$                   | 5   |
| ◆ Don't know/unsure if patient has been hospitalized                                                                           | Excluded                   | 7   |
| Q3a: To the best of your knowledge, what is this patient's occupational status?                                                | Employed/in education      |     |
| ◆ Unemployed                                                                                                                   | No                         | 304 |
| ◆ Employed (full-time)                                                                                                         | Yes                        | 22  |
| ◆ Employed (part-time)                                                                                                         | Yes                        | 36  |
| ◆ In education/studying (full- or part-time)                                                                                   | Yes                        | 20  |
| ◆ Working in a volunteer capacity                                                                                              | Yes                        | 18  |
| ◆ Don't know/unsure                                                                                                            | Excluded                   | 8   |
| Q5d: Which of the following best describes the onset of this patient's treatment-resistant schizophrenia (TRS)?                | TRS onset                  |     |
| ◆ Patient responded to more than one treatment, but was classified as having TRS within the first 5 years of treatment         | $\leq 5$ years             | 128 |
| ◆ Patient responded to more than one treatment, but was classified as having TRS after more than 5 years of treatment          | $> 5$ years                | 122 |
| ◆ Patient was classified as having TRS from their first treatment trial (i.e., has never responded to therapy)                 | From first treatment       | 31  |
| ◆ Patient was classified as having TRS from their first relapse (i.e., responded to first treatment trial, then lost response) | $\leq 5$ years             | 46  |
| ◆ Don't know/unsure                                                                                                            | Excluded                   | 60  |

Supplement to: Christoph U. Correll, Thomas Brevig, Cecilia Brain. Exploration of treatment-resistant schizophrenia subtypes based on a survey of 204 US psychiatrists.
